# Supplementary material for: A Fluorogenic Probe for Ultrafast and Reversible Detection of Formaldehyde in Neurovascular Tissues
Source: PubMed Central journal article supplement — Theranostics. 2017 Jun 1;7(8):2305–13. doi: 10.7150/thno.19554 (PMC5505062; doi:10.7150/thno.19554), 2017-06-01
Supplement: thnov07p2305s1.pdf [file thnov07p2305s1.pdf]

# A Fluorogenic Probe for Ultrafast and Reversible Detection of Formaldehyde in Neurovascular Tissues

## Supplementary Figures

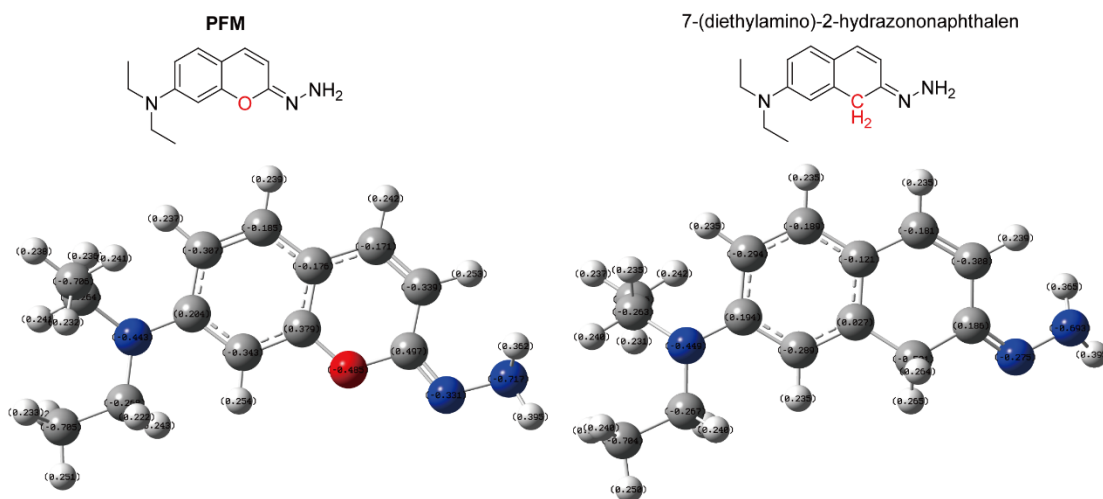

**Figure S1.** Electron density map of PFM and the control compound calculated by Gaussian using B3LYP method.

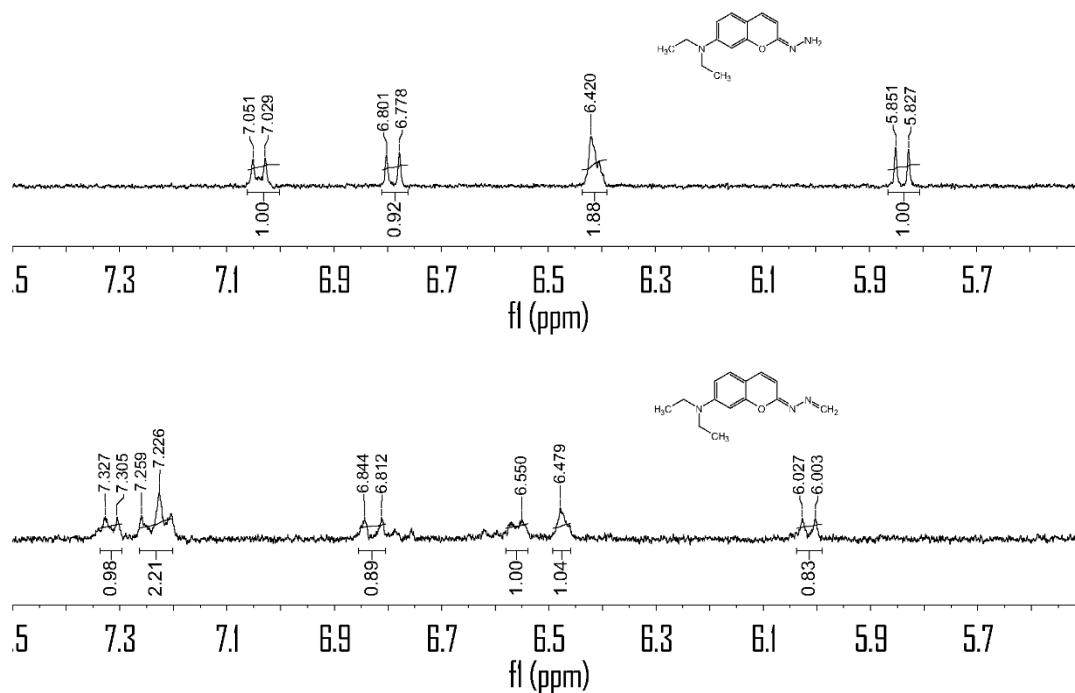

**Figure S2.** <sup>1</sup>H NMR of PFM in DMSO-*d*<sub>6</sub>/D<sub>2</sub>O (1:1) before (top) and after (bottom) the addition of 10 eq. formaldehyde.

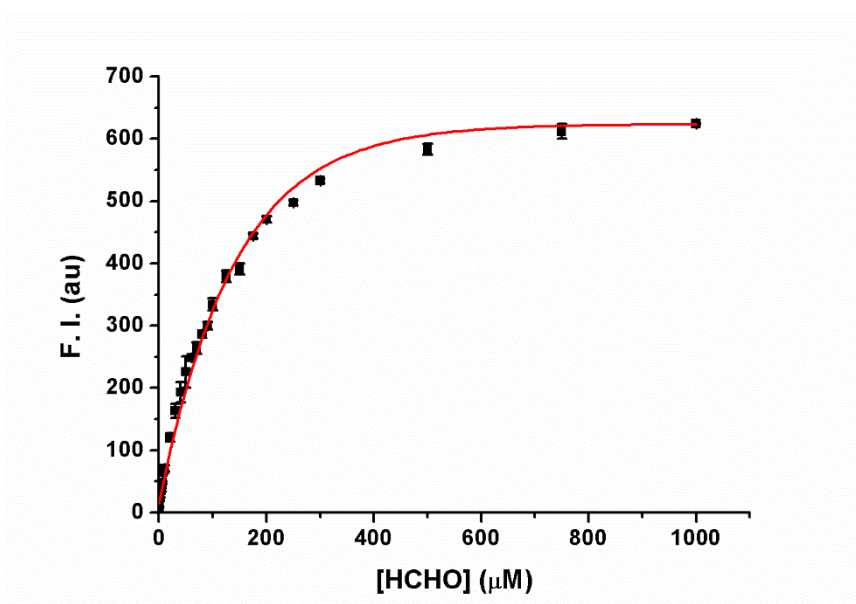

**Figure S3.** Plot of fluorescent intensity at 500 nm of **PFM** (10 μM) against the concentrations of FA gave an exponential dependence. Data were acquired in PBS (10 mmol, pH 7.4) at ambient temperature after a reaction time of 5 min ( $\lambda_{\text{ex}}$  451 nm).

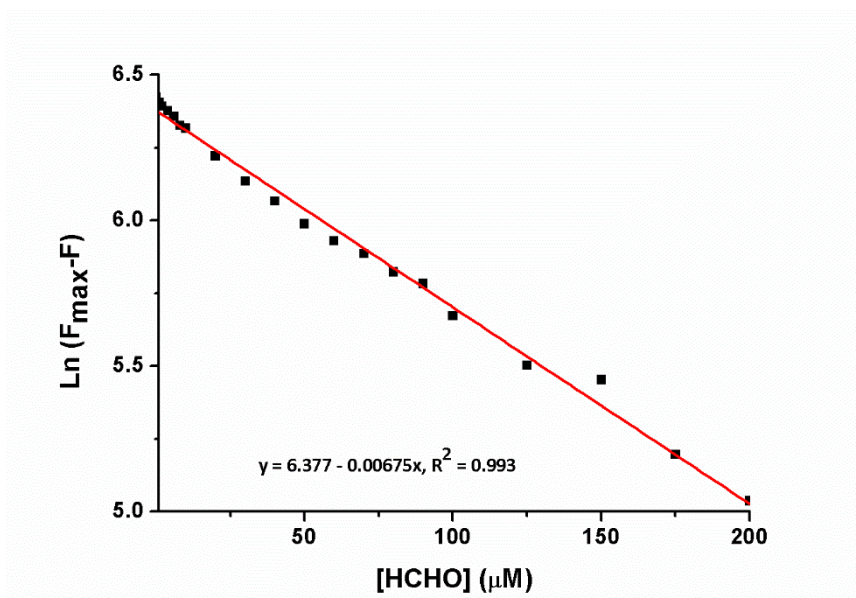

**Figure S4.** The Napierian logarithm of  $F_{\text{max}}$  minus  $F$  correlated linearly with FA concentrations (0 to 200 μM), and wherein  $F_{\text{max}}$  is the maximum fluorescent intensity at 500 nm of **PFM** after the treatment of a large enough amount of FA, and  $F$  is the fluorescence after the treatment of corresponding amount of FA. Data were acquired in the same way as those in **Figure S3**.

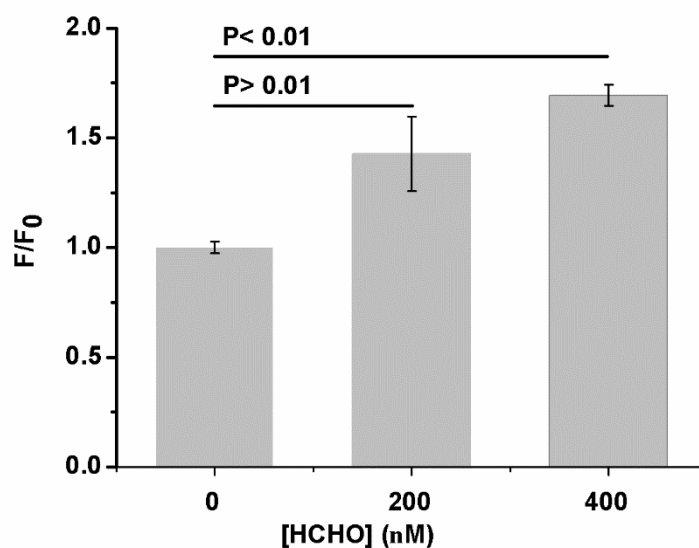

**Figure S5.** The detection limit determination of **PFM**. Results were obtained as the concentration of FA that induced a statistically significant increase in fluorescence intensity at 500 nm compared with a blank control after 5 min with a P-value < 0.01. Experiments were carried out by incubating **PFM** (10  $\mu$ M) with FA (0, 200, 400 nM) in PBS (10 mM, pH 7.4) at ambient temperature for 5 min and then collecting the emission at 500 nm by excitation at 451 nm. F: fluorescence intensity at 500 nm after treating **PFM** with various concentrations of FA; F<sub>0</sub>: fluorescence intensity at 500 nm of probe blank control. Statistical analyses were performed with a two-tailed Student's t-test (n = 3). Error bars are standard deviation.

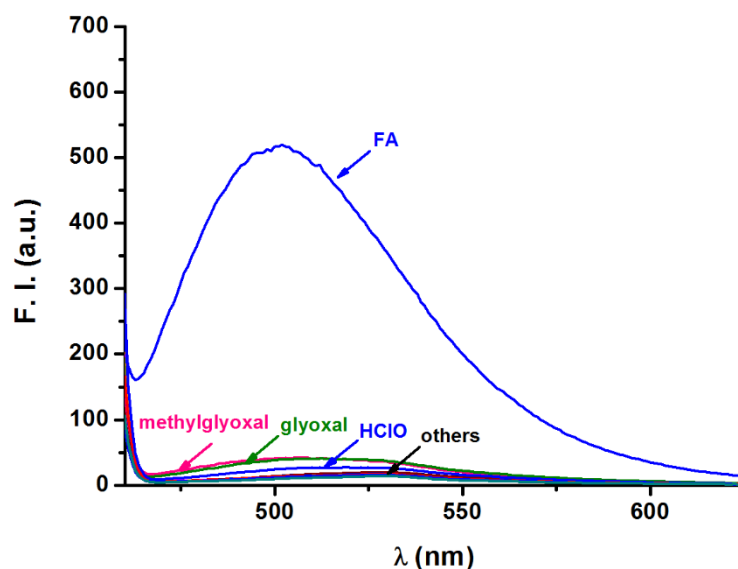

**Figure S6.** Fluorescent spectra of **PFM** (10  $\mu$ M) in the presence of various bio-relevant carbonyl species (300  $\mu$ M) or biologically oxidizing or reducing conditions. Spectra were taken in PBS (10 mM, pH 7.4) at ambient temperature with excitation 451 nm.

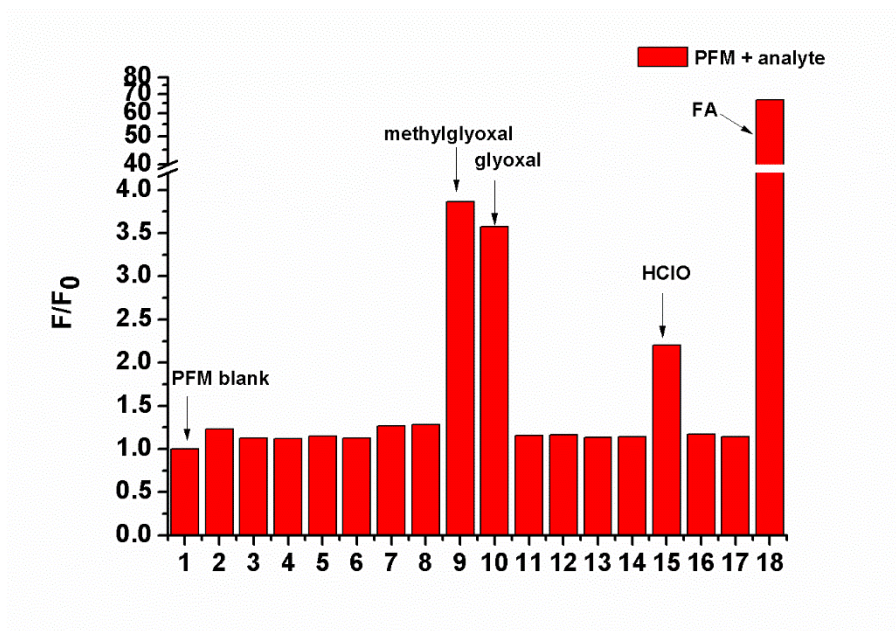

**Figure S7.** Enlarged picture of Figure 2D (with the selectivity results only).

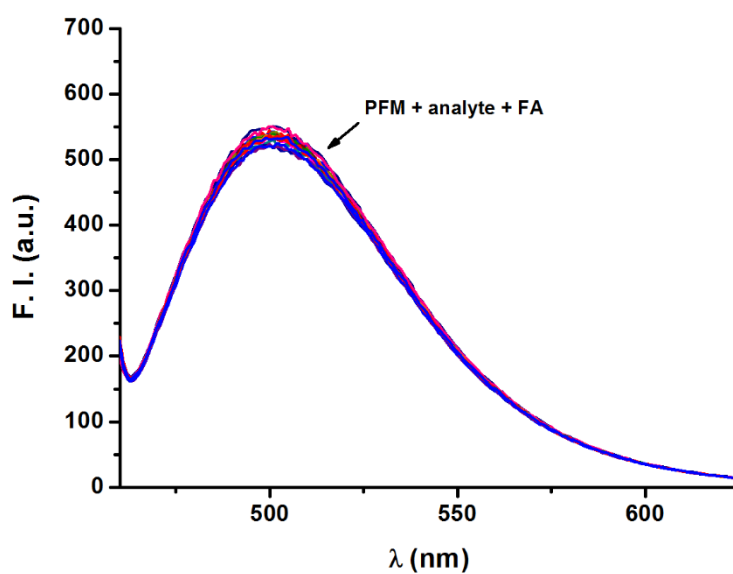

**Figure S8.** Fluorescent spectra of PFM (10  $\mu$ M) in the presence of FA (300  $\mu$ M) together with one of the various bio-relevant carbonyl species (300  $\mu$ M). Spectra were taken in PBS (10 mM, pH 7.4) at ambient temperature with excitation 451 nm.

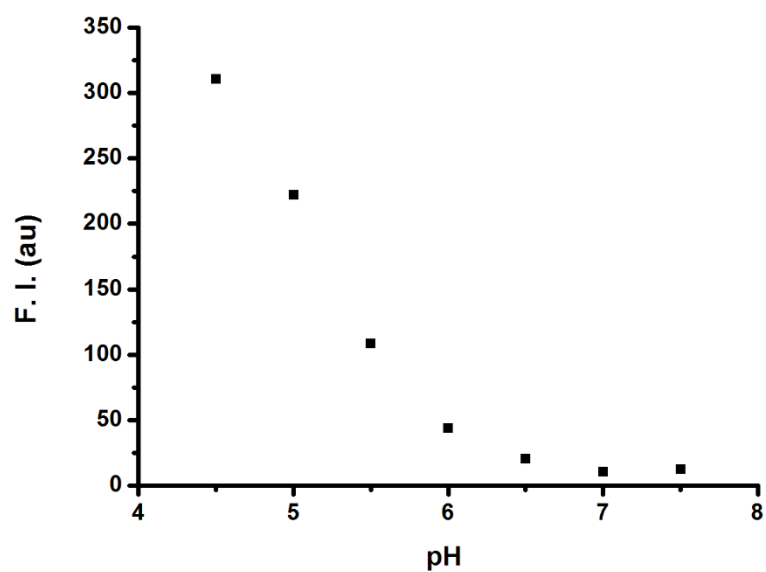

**Figure S9.** Fluorescent intensity of **PFM** (10  $\mu\text{M}$ ) at 513 nm in PBS of various pH values. Data were obtained at ambient temperature ( $\lambda_{\text{ex}}$  451 nm).

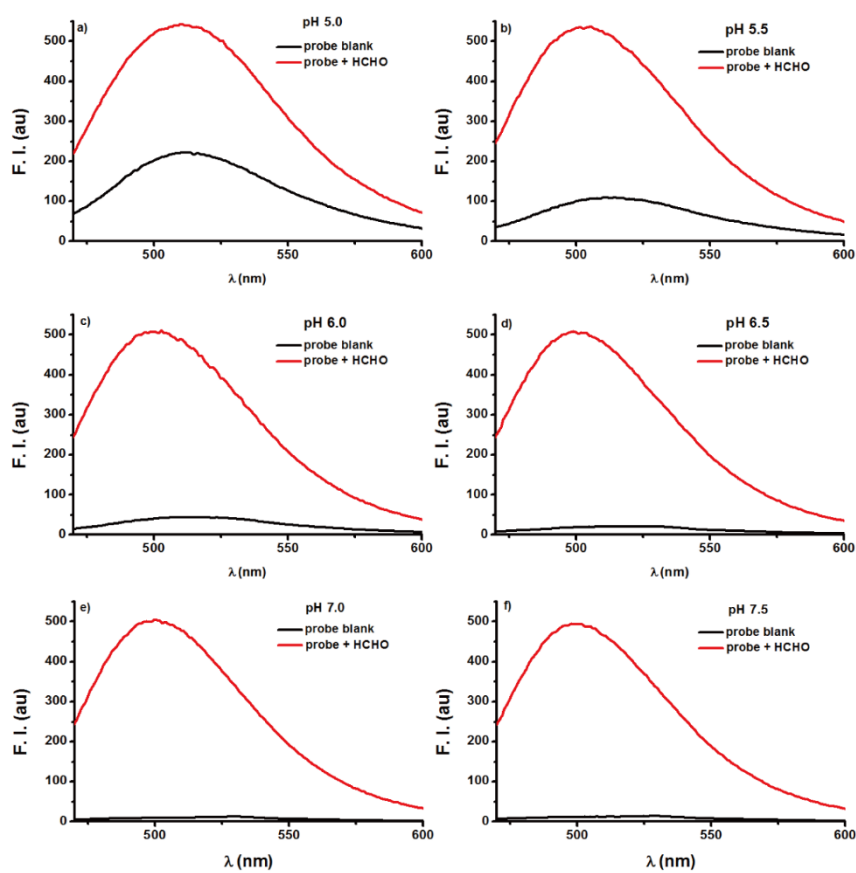

**Figure S10.** Spectra of **PFM** (10  $\mu\text{M}$ ) before and after the treatment of FA (200  $\mu\text{M}$ , 5 min) in PBS (10 mM) of various pH values at ambient temperature ( $\lambda_{\text{ex}}$  451 nm).

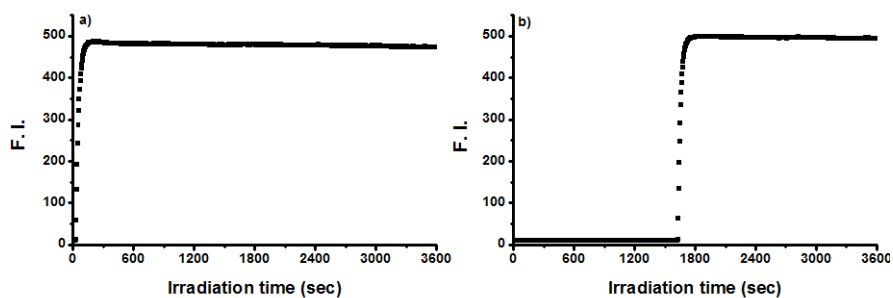

**Figure S11.** Photo-stability of PFM (10  $\mu\text{M}$ ) and the PFM-FA product. (a) PFM (10  $\mu\text{M}$ ) was treated with FA (200  $\mu\text{M}$ ) and the intensity at 500 nm was collected under continuous excitation. (b) PFM (10  $\mu\text{M}$ ) was continuously excited and then treated with FA (200  $\mu\text{M}$ ). Data were collected at ambient temperature with excitation 451 nm.

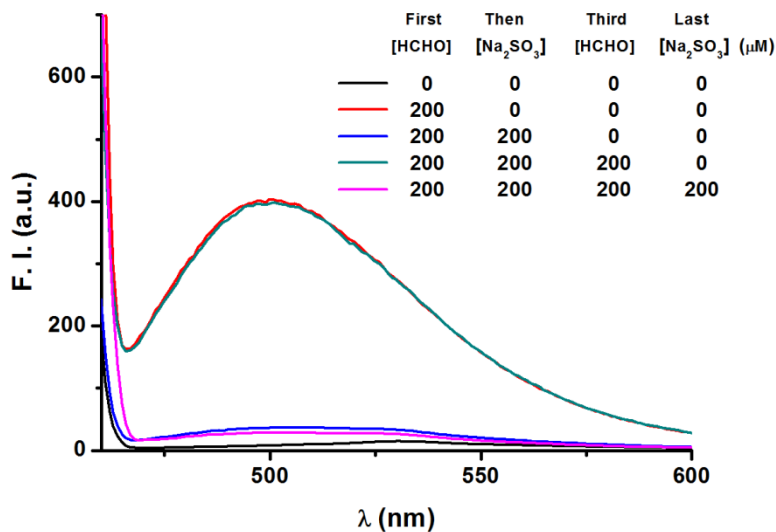

**Figure S12.** Spectra of PFM (10  $\mu\text{M}$ ) after the sequential treatment of FA (200  $\mu\text{M}$ , 5 min), NaHSO<sub>3</sub> (200  $\mu\text{M}$ , 15 min). Spectra were recorded in PBS (10 mM, pH 7.4) at ambient temperature ( $\lambda_{\text{ex}}$  451 nm).

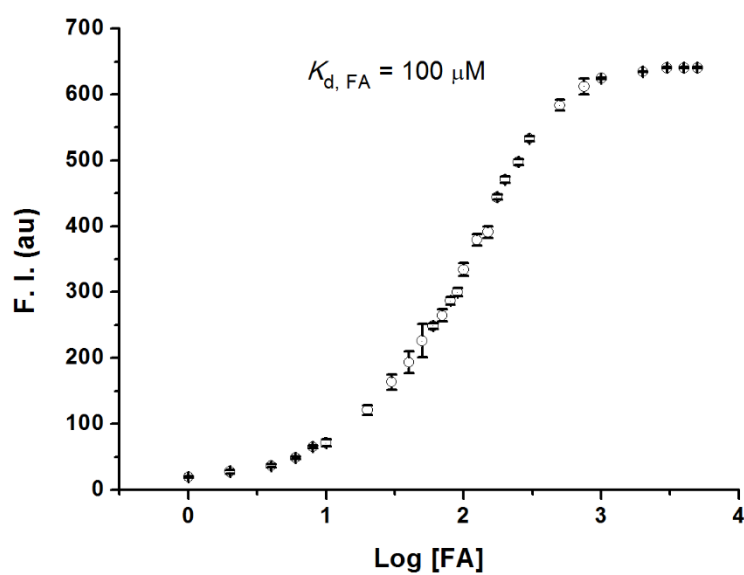

**Figure S13.** Plot of fluorescent intensity at 500 nm of **PFM** (10  $\mu\text{M}$ ) against the concentrations of FA. Data were acquired in the same way as those in **Figure S3**. Employing a literature method [41], the  $K_{d, \text{FA}}$  of **PFM** was calculated to be around 100  $\mu\text{M}$ .

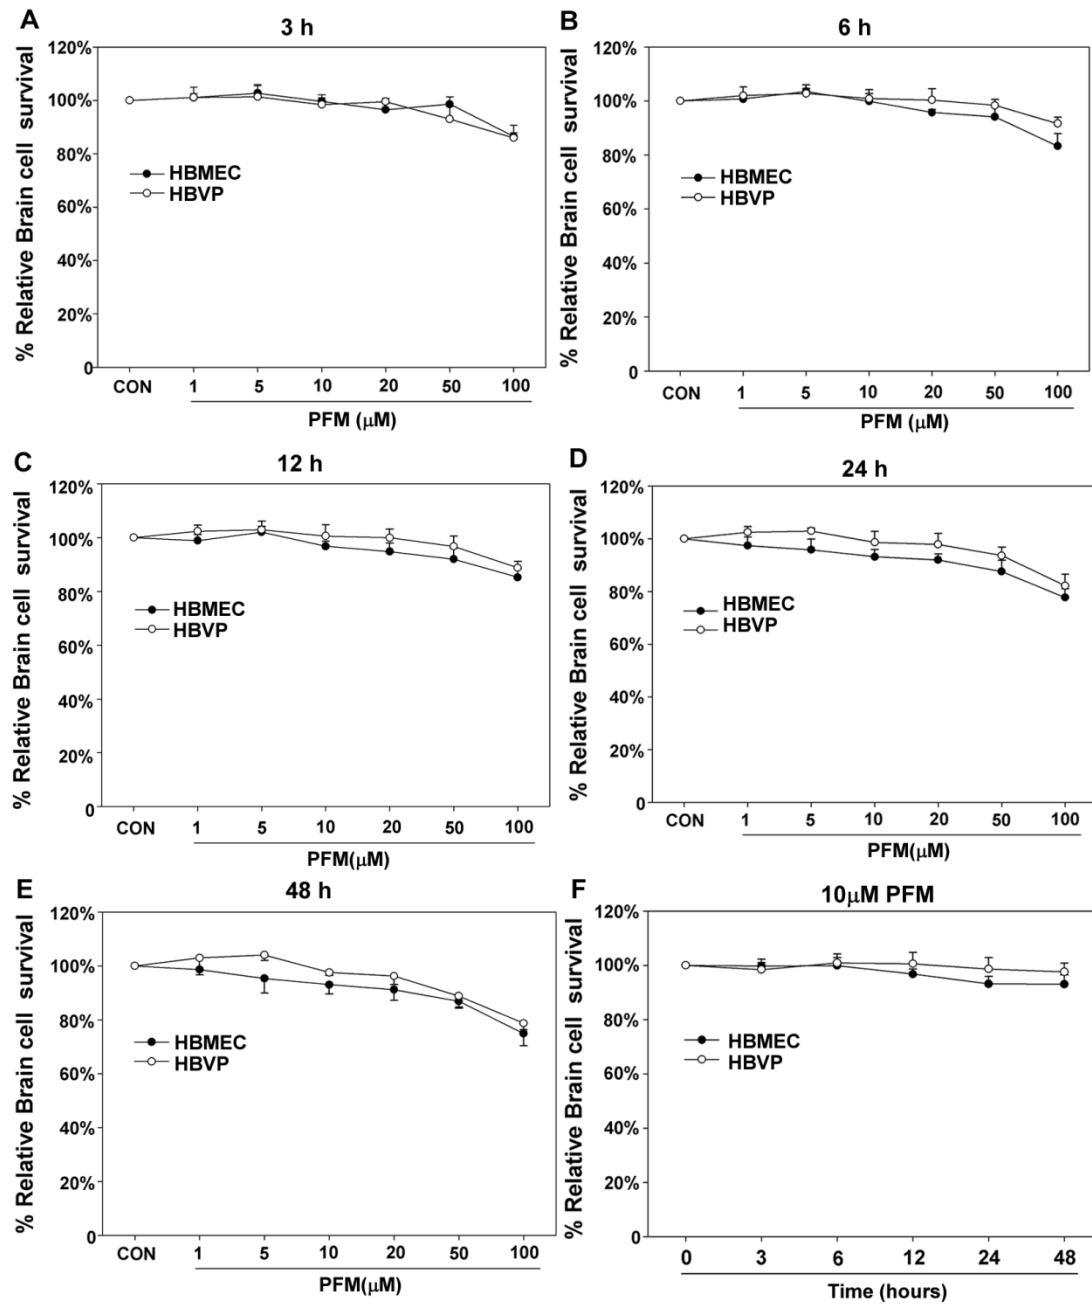

**Figure S14.** Cytotoxicity of PFM was assessed in HBMECs and HBVPs by CCK8 assays. PFM of 1 μM, 5 μM, 10 μM, 25 μM, 50 μM, and 100 μM were added to cells, and they were allowed to incubate for of 3 h (A), 6 h (B), 12 h (C), 24 h (D), 48 h (E). After introducing CCK8 (10 μL) solution at 37 °C in a 95% humidified atmosphere with 5% CO<sub>2</sub> for 1 h, the absorption at 450 nm was measured by Microplate Spectrophotometer (MD I3X). (F) The cytotoxicity of PFM (10 μM) was assessed in HBMECs and HBVPs from 0 h-48 h.



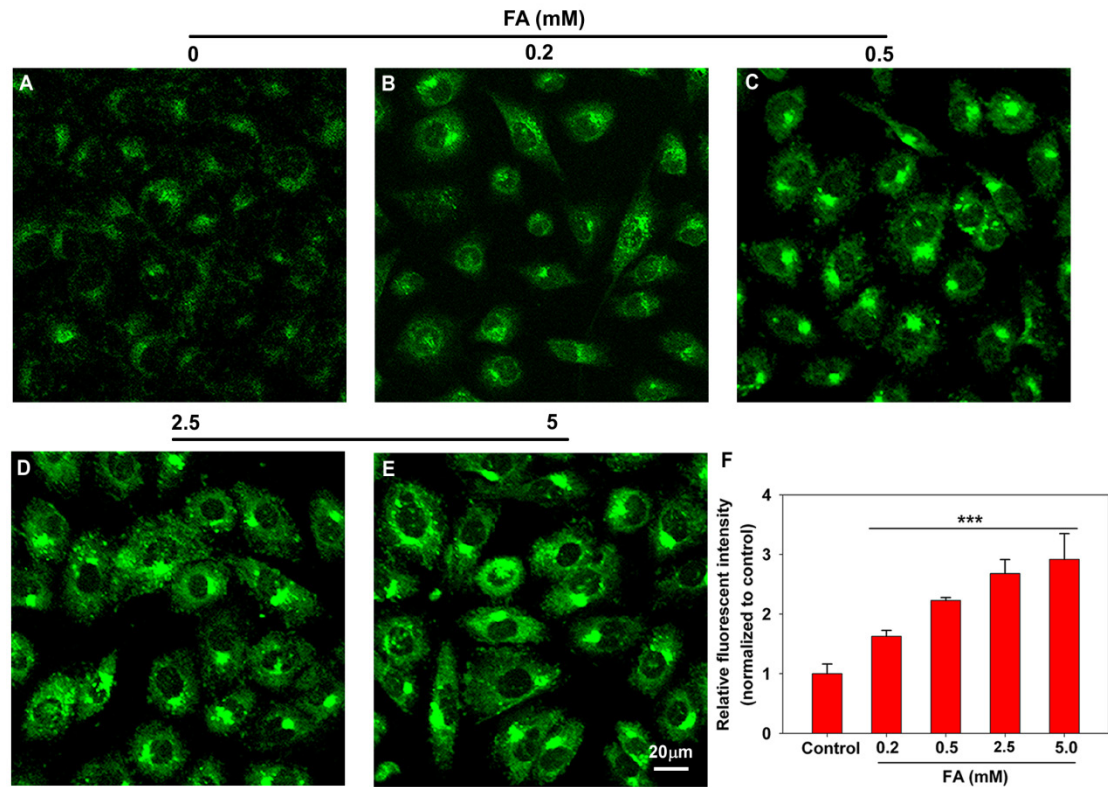

**Figure S15.** Confocal imaging of **PFM** for detecting exogenous FA in live HBVPs. Cells are treated with 10 μM **PFM** for 15 min at 37 °C, then washed with PBS (pH 7.4), followed by FA incubation for 15 min. control (A); 0.2 mM FA (B); 0.5 mM FA (C); 2.5 mM FA (D); 5 mM FA (E). (F) Quantification of image data. **PFM** fluorescence was monitored at 515-545 nm ( $\lambda_{ex}$ =488 nm). Scale bar=20 μm.

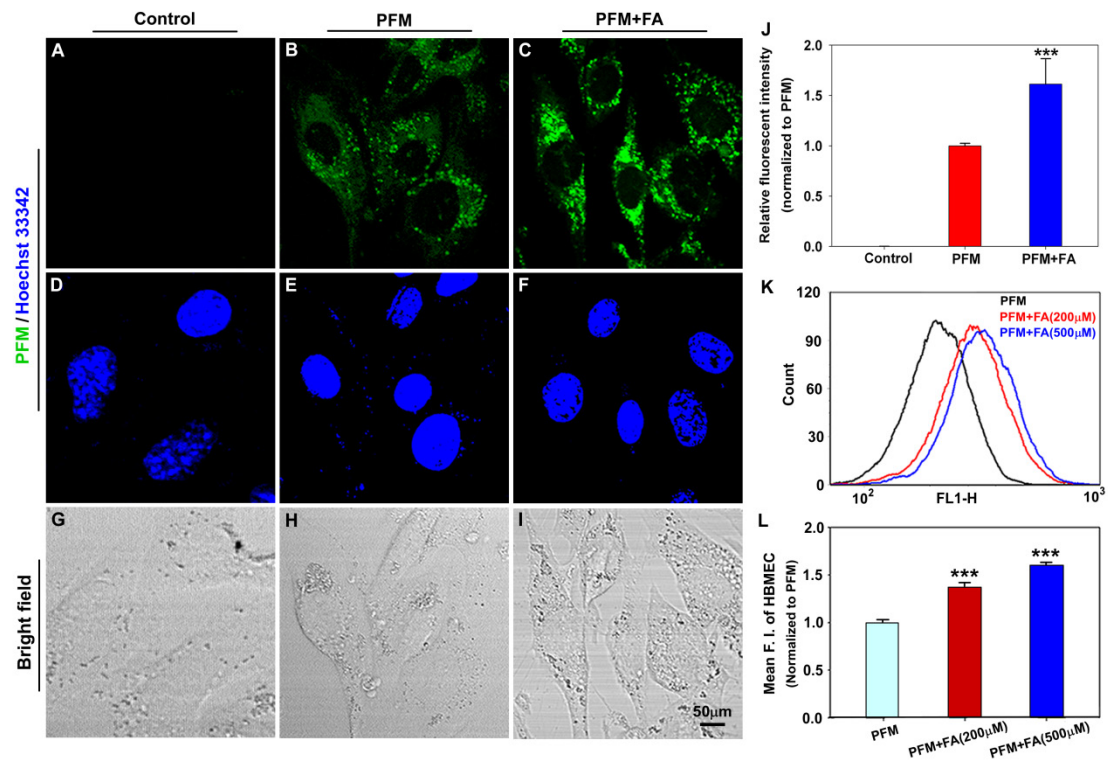

**Figure S16.** Imaging exogenous FA in living HBMECs. The fluorescence intensity of **PFM** was assessed by the confocal microscope (A-J) and flow cytometry analysis (K, L). HBMECs were treated with **PFM** (10  $\mu$ M) for 15 min at 37  $^{\circ}$ C, then washed with PBS (pH 7.4) and followed by FA (200  $\mu$ M for C, and 200  $\mu$ M or 500  $\mu$ M for K and L) incubation for 15 min. Nuclei were stained with Hoechst 33342. (J) Quantification of image data. Data are expressed as mean $\pm$ S.E.M., n=10, \*\*\*P<0.01 versus **PFM** alone. For flow cytometry analysis, each plot represented 10,000 viable cells (non-viable cells were excluded from FACS analysis by appropriate gating). Data are expressed as mean $\pm$ S.E.M., a minimum of 3 images for each condition were quantified and averaged, \*\*\*P<0.001 versus **PFM** alone. The **PFM** fluorescence was monitored at 515-545 nm ( $\lambda_{ex}$ =488 nm).

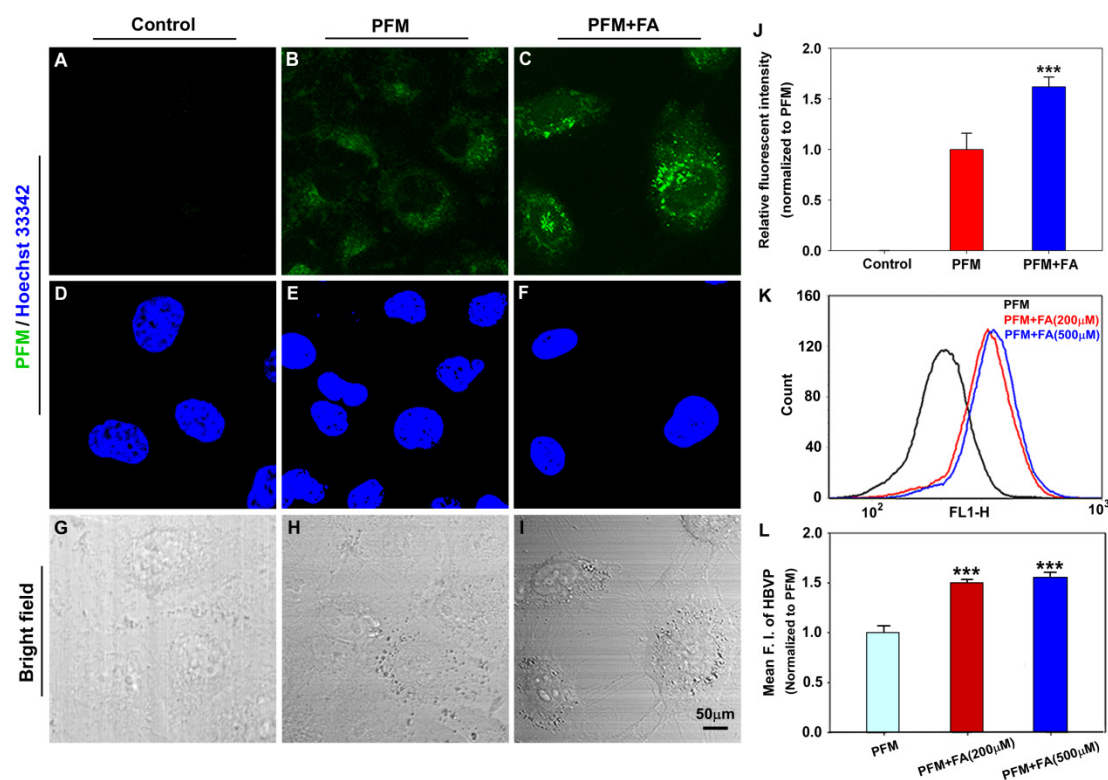

**Figure S17.** Imaging exogenous FA in living HBVPs. The fluorescence intensity of **PFM** was assessed by the confocal microscope (A-J) and flow cytometry analysis (K, L). HBVPs were treated with **PFM** (10  $\mu$ M) for 15 min at 37  $^{\circ}$ C, then washed with PBS (pH 7.4) and followed by FA (200  $\mu$ M for C, and 200  $\mu$ M or 500  $\mu$ M for K and L) incubation for 15 min. Nuclei were stained with Hoechst 33342. (J) Quantification of image data. For flow cytometry analysis, each plot represented 10,000 viable cells (non-viable cells were excluded from FACS analysis by appropriate gating). Data are expressed as mean $\pm$ S.E.M., a minimum of 3 images for each condition were quantified and averaged, \*\*\*P<0.001 versus **PFM** alone. The **PFM** fluorescence was monitored at 515-545 nm ( $\lambda_{ex}$ =488 nm).

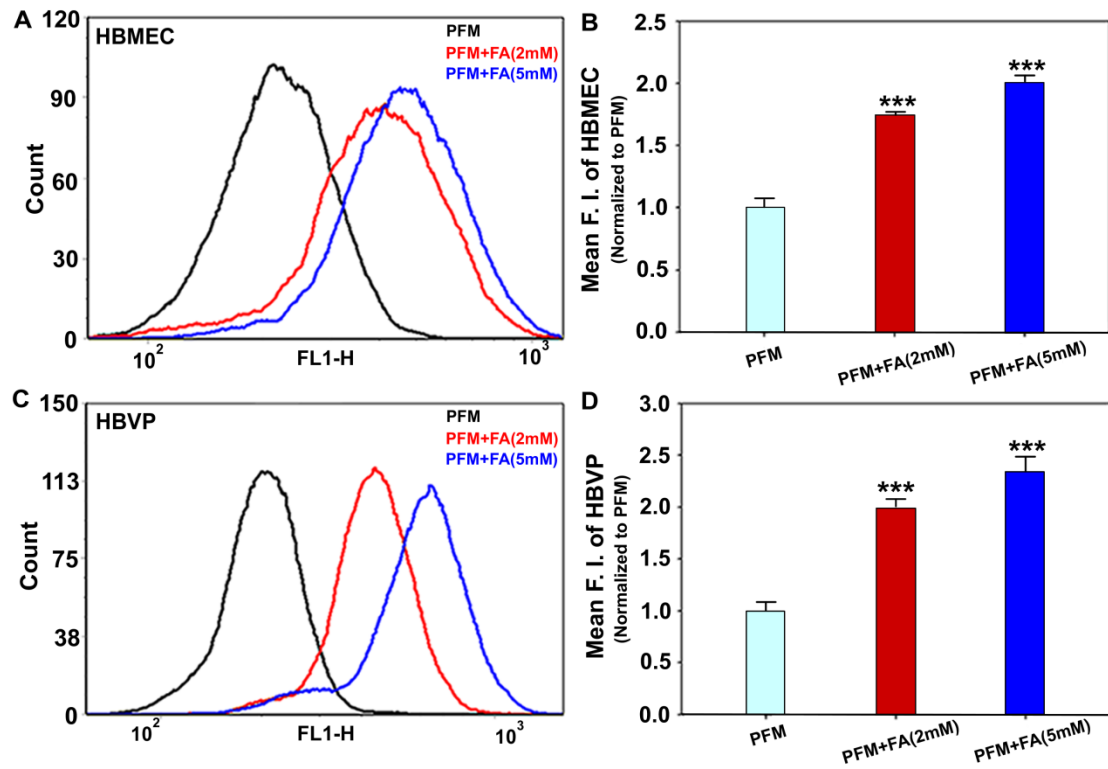

**Figure S18.** Flow cytometry analysis of exogenous FA of higher concentrations in living HBMEC (A, B) and HBVP (C, D) stained with **PFM** (10  $\mu$ M) for 15 min at 37  $^{\circ}$ C, and then incubated with FA (2 mM and 5 mM) at 37  $^{\circ}$ C for 15 min. The **PFM** fluorescence was monitored at 515-545 nm ( $\lambda_{ex}$ =488 nm). Quantification of fluorescence intensity by flow cytometry analysis of HBMECs or HBVPs (B, D). Each plot represented 10,000 viable cells (non-viable cells were excluded from FACS analysis by appropriate gating). Data are expressed as mean  $\pm$  S.E.M., \*\*\* $P$  < 0.001 versus **PFM**.

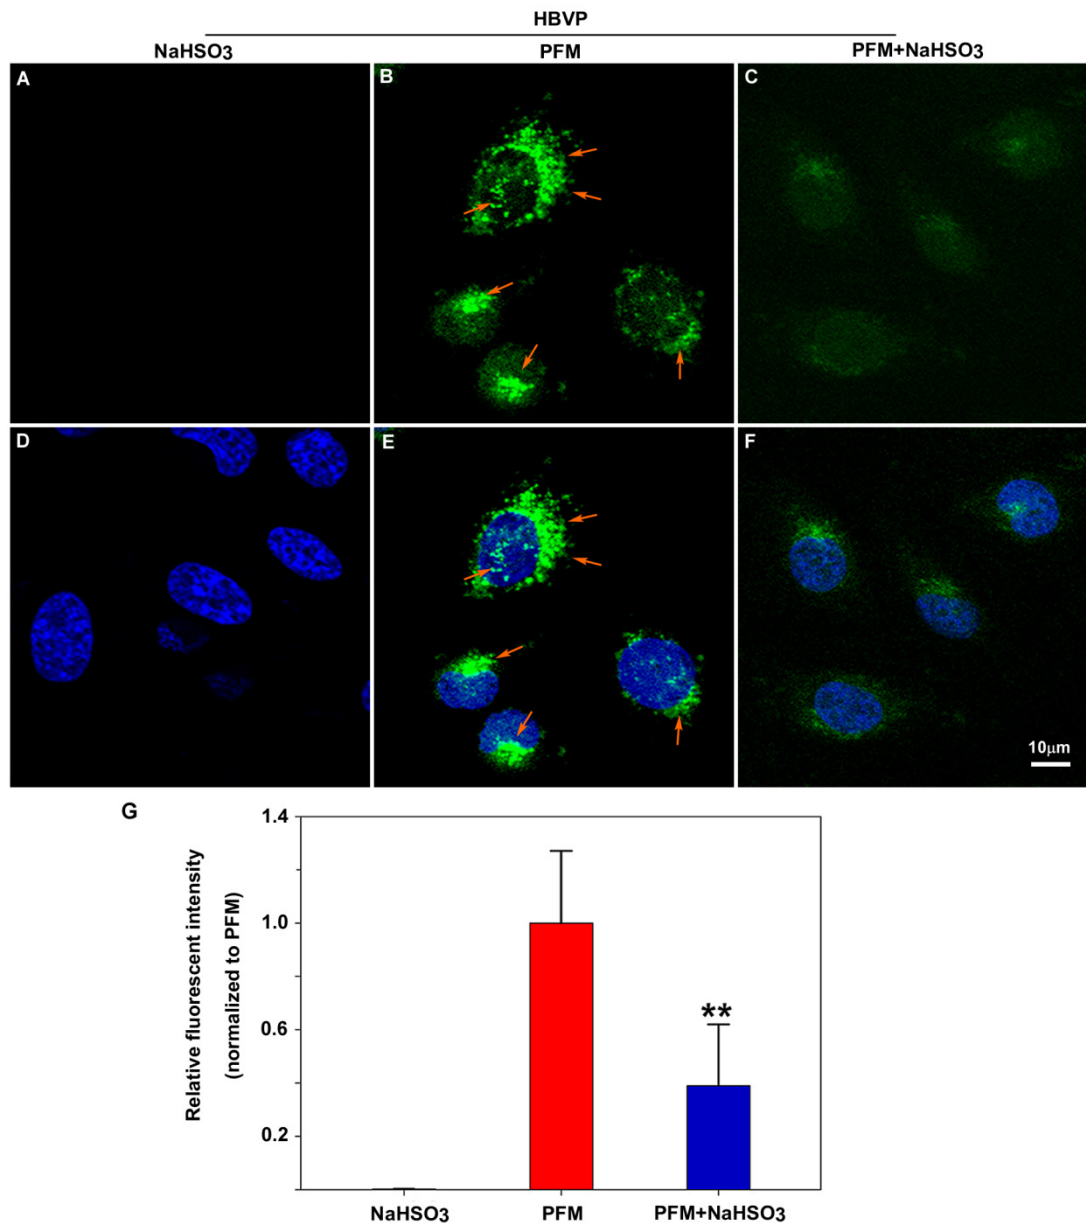

**Figure S19.** Imaging endogenous FA in live neurovascular cell HBVPs. The fluorescence of **PFM** was detected by confocal microscope (A-F), HBVPs are pre-treatment with NaHSO<sub>3</sub> for 30 min, then washed with PBS (pH 7.4) and followed by **PFM** (10 μM) incubation for 15 min at 37 °C. Nuclei were stained with Hoechst 33342. (G) Quantification of image data. Data are expressed as mean±S.E.M., a minimum of 3 images for each condition were quantified and averaged, \*\* $P < 0.01$  versus **PFM** alone. The **PFM** fluorescence was monitored at 515-545 nm ( $\lambda_{ex}$ =488 nm).



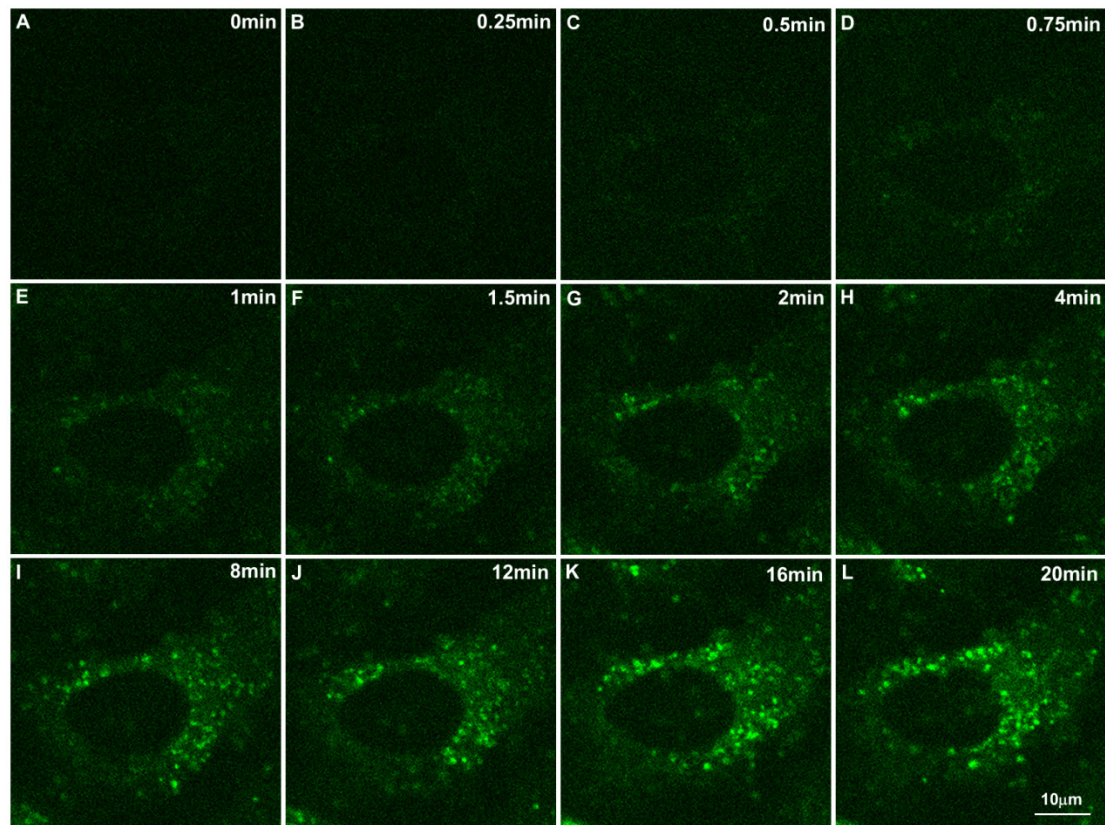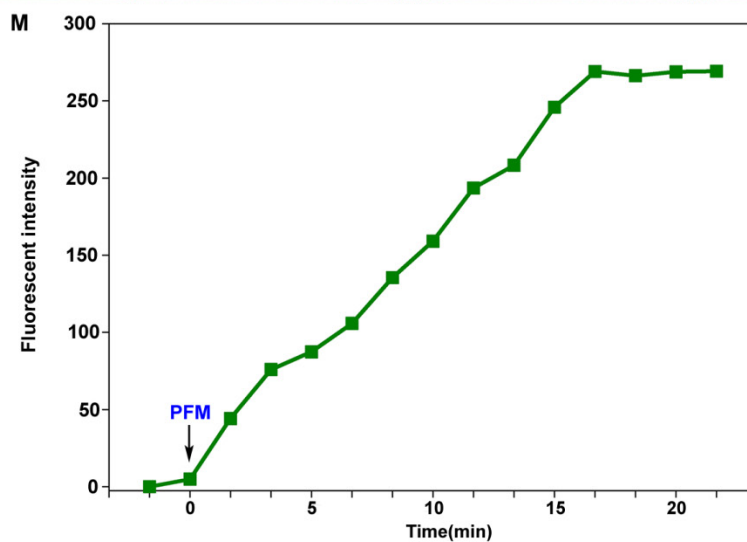

**Figure S20.** Real-time visualization of endogenous FA in living HBMECs. (A-L) The time-series images are individual frames from a continuous time-lapse movie and show dynamic fluorescence elevation with **PFM** (10  $\mu$ M) treatment. (M) Mean values of fluorescence intensity from time-lapse movie (video S1) were measured to quantify the progressive of endogenous FA. The **PFM** fluorescence was monitored at 515-545 nm ( $\lambda_{ex}$ =488 nm).

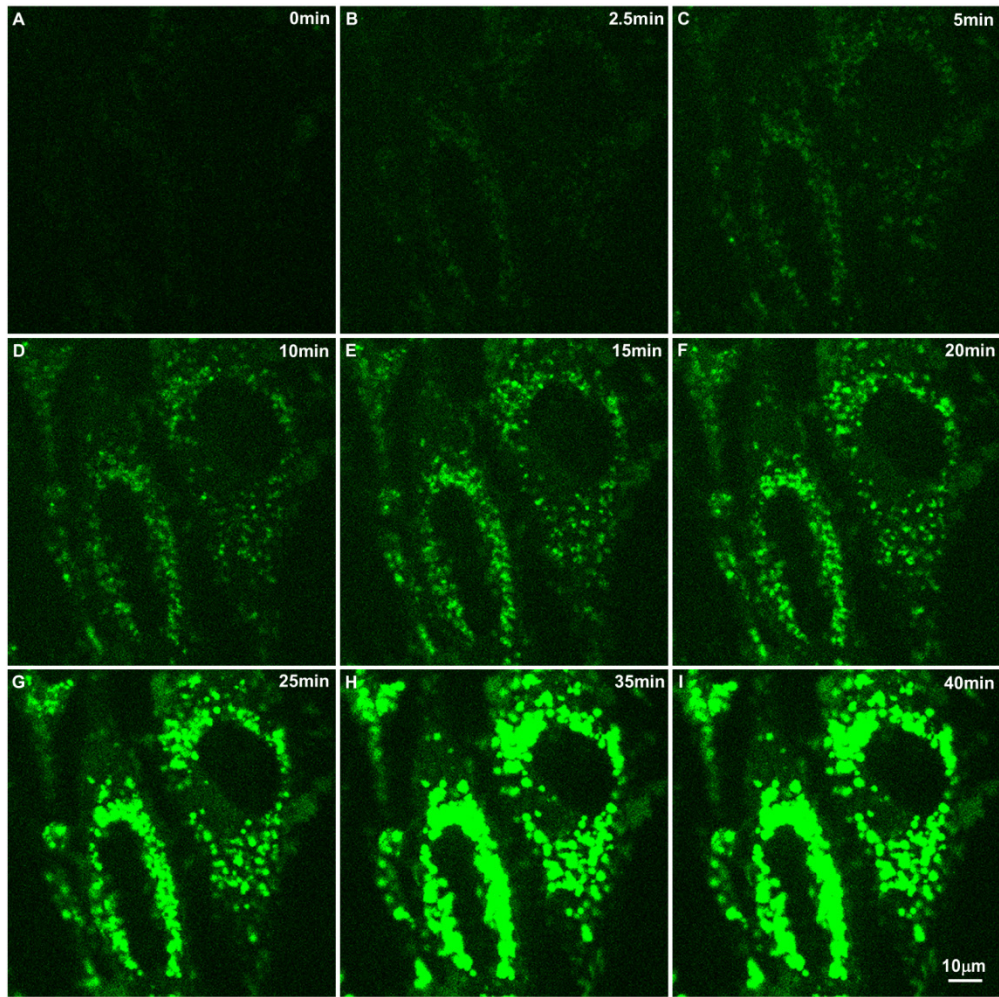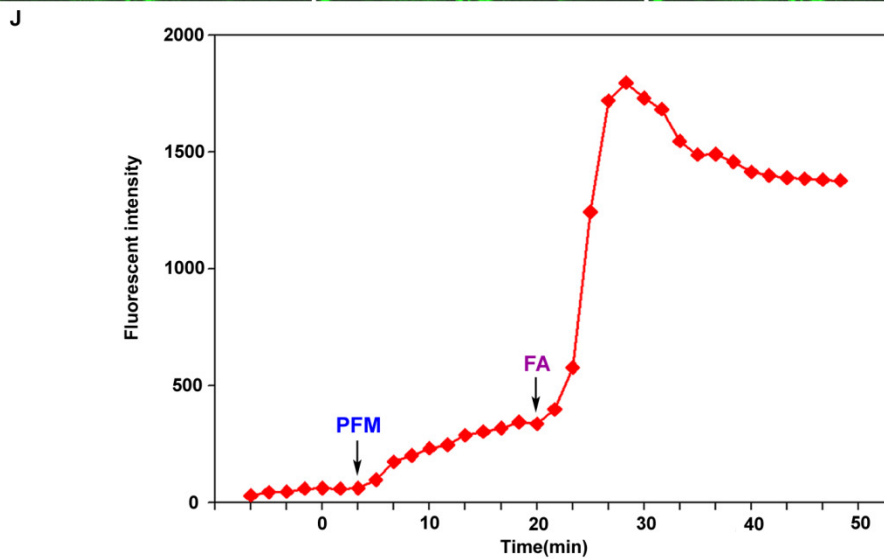

**Figure S21.** Real-time visualization of exogenous FA in living HBMECs. The time-series images are individual frames from a continuous time-lapse movie and show dynamic fluorescence elevation with **PFM** (10 μM) (A-F) treatment and exogenous FA (500 μM) (G-I). (J) Mean values of fluorescence intensity from time-lapse movie (video S2) were measured to quantify the progressive of endogenous and exogenous FA. The **PFM** fluorescence was monitored at 515-545 nm ( $\lambda_{ex}$ =488 nm).



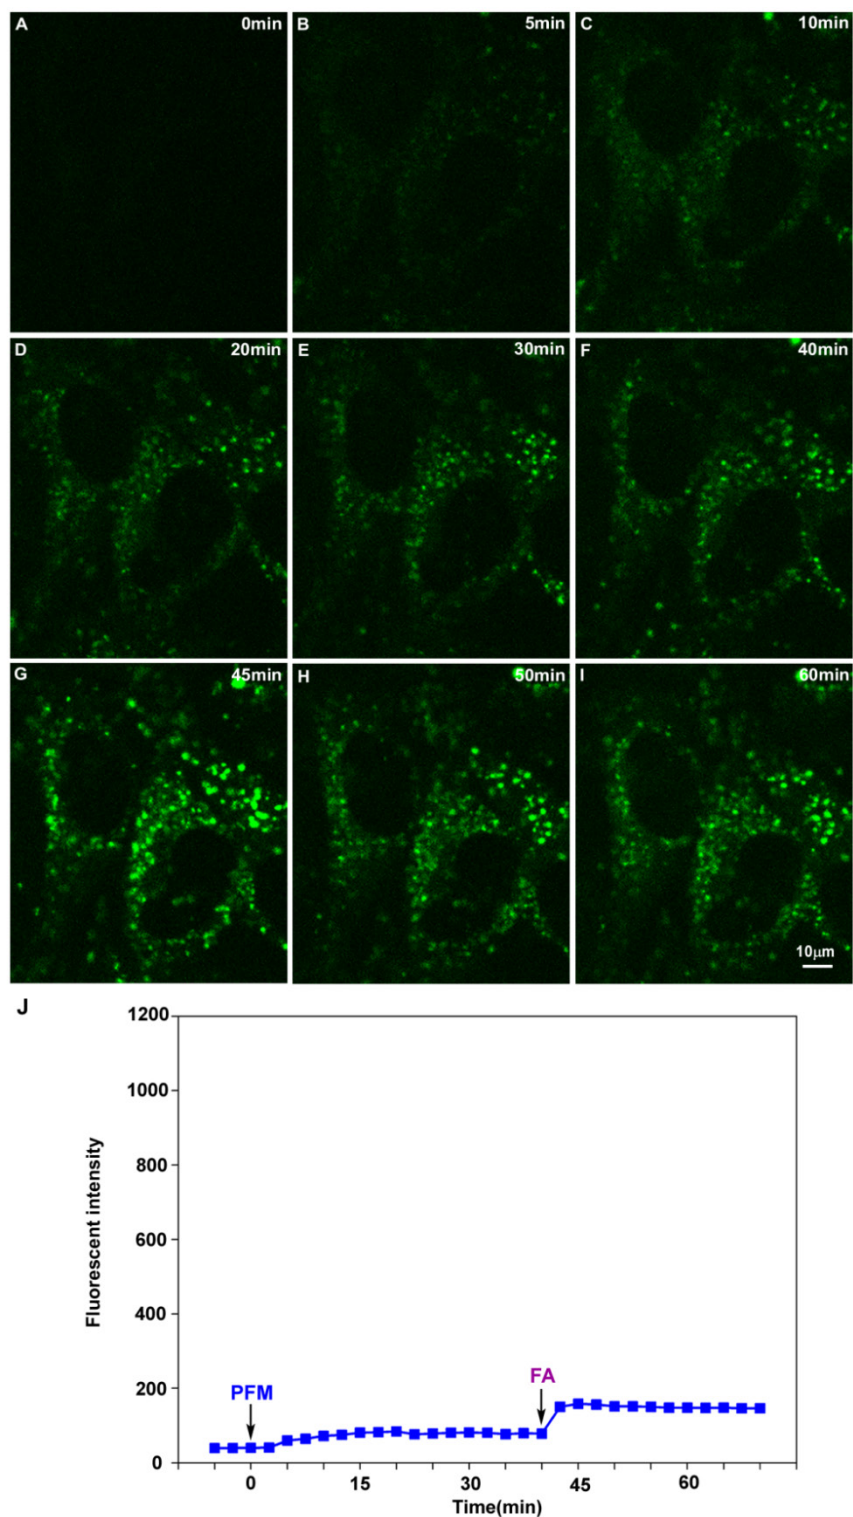

**Figure S22.** Real-time visualization of endogenous and exogenous FA in living HBMECs with  $\text{NaHSO}_3$  ( $200 \mu\text{M}$ ) pre-treatment for 30 min. The time-series images are individual frames from a continuous time-lapse movie and show dynamic fluorescence elevation with **PFM** ( $10 \mu\text{M}$ ) (A-F) treatment and exogenous FA ( $500 \mu\text{M}$ ) (G-I). (J) Mean values of fluorescence intensity from time-lapse imaging (video S3) were measured to quantify the progressive of endogenous and exogenous FA upon  $\text{NaHSO}_3$  pre-treatment. The **PFM** fluorescence was monitored at 515-545 nm ( $\lambda_{\text{ex}}=488 \text{ nm}$ ).

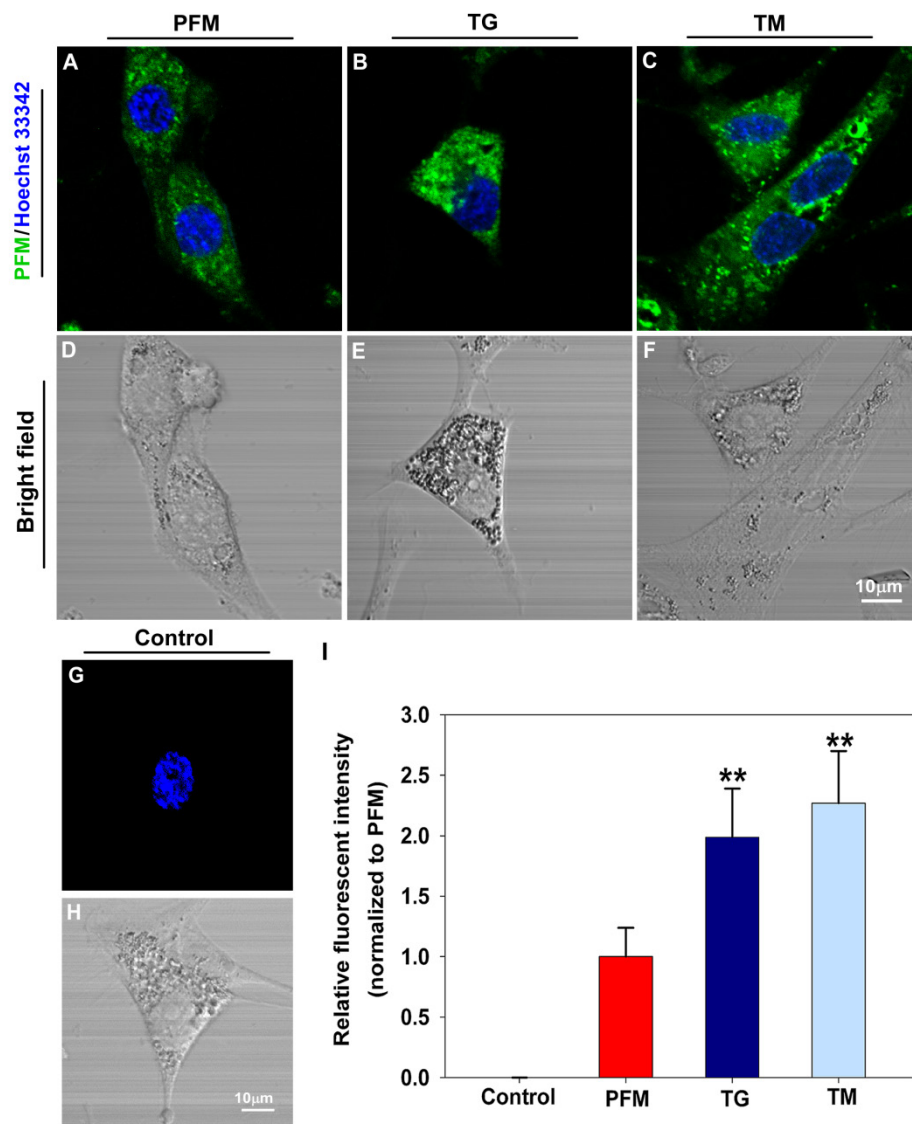

**Figure S23.** Imaging endogenous FA in living HBMECs upon ER stress. HBMECs were pre-treatment with (B, E) thapsigargin (TG, 5  $\mu$ M) and (C, F) tunicamycin (TM, 5  $\mu$ M) for 30 min, then washed with PBS (pH 7.4) and followed by **PFM** (10  $\mu$ M) incubation for 15 min at 37  $^{\circ}$ C. Fluorescence were obtained after TG/TM incubation for 60 min. Nuclei were stained with Hoechst 33342. (A, D) HBMECs treated with **PFM** only. (G, H) HBMECs treated without **PFM**. (I) Quantification of image data. Data are expressed as mean $\pm$ S.E.M., a minimum of 3 images for each condition were quantified and averaged, \*\* $P$ <0.01 versus **PFM** alone. The **PFM** fluorescence was monitored at 515-545 nm ( $\lambda_{ex}$ =488 nm).



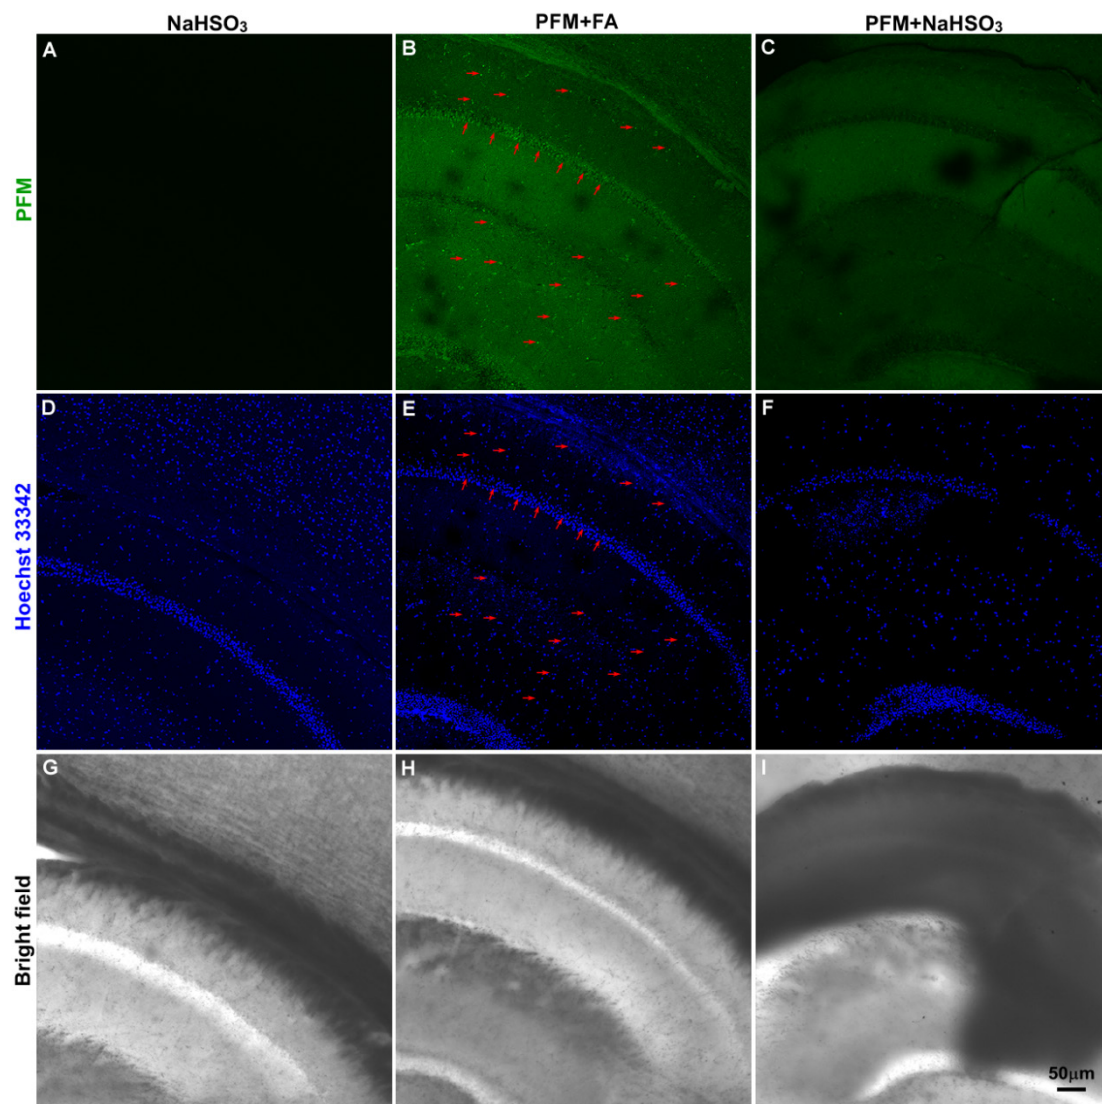

**Figure S24.** Application of **PFM** for monitoring FA in living brain tissue of mice. (A, D, G) Confocal fluorescence images of cerebral cortex incubated with NaHSO<sub>3</sub> (200 μM) for 30 min. (B, E, H) Fluorescence images of cerebral cortex incubated with exogenous FA (500 μM) for 30 min, followed by incubation with **PFM** (20 μM) for another 30 min. (C, F, I) Fluorescence images of cerebral cortex incubated with NaHSO<sub>3</sub> (200 μM) for 30 min, followed by incubation with **PFM** (20 μM) for another 30 min. The **PFM** fluorescence was monitored at 515-545 nm ( $\lambda_{ex}$ =488 nm). Nuclei were stained with Hoechst 33342 (A2, B2, C2). Bright field image (A3, B3, C3). Scale bar=50 μm.

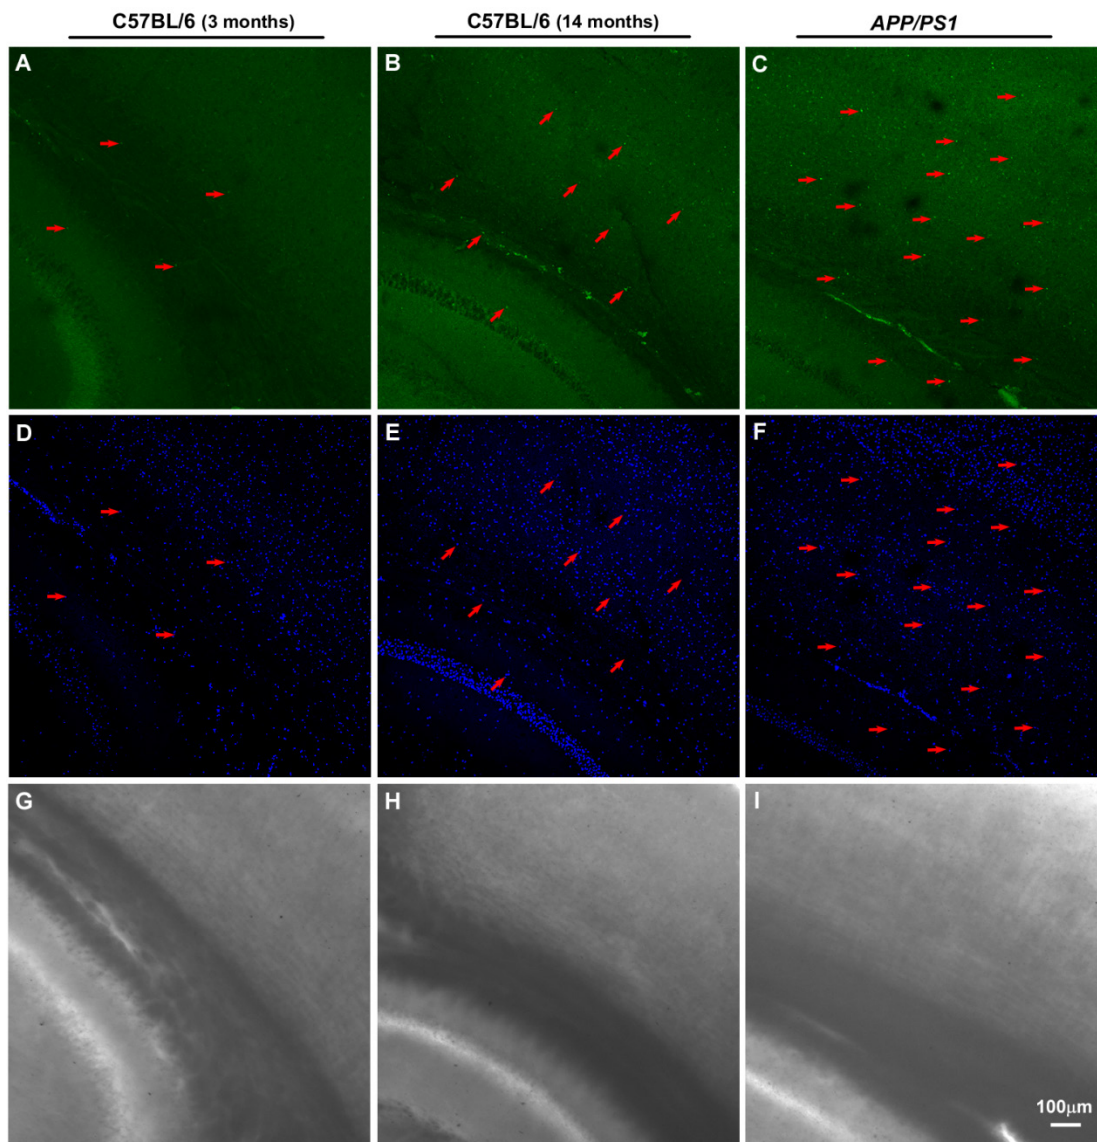

**Figure S25.** Application of **PFM** for monitoring endogenous FA in living brain tissue slides of C57BL/6 and *APP/PS1* transgenic mice. Fluorescence images of cerebral cortex of C57BL/6 and *APP/PS1* transgenic mice incubated with **PFM** (20  $\mu$ M) for 30 min, (A, D, G) 3 month old C57BL/6 mice, (B, E, H) 14 month old C57BL/6 mice, (C, F, I) *APP/PS1* transgenic mice. The arrow indicated the cells with high fluorescence. Scale bar=100  $\mu$ m. The **PFM** fluorescence was monitored at 515-545 nm ( $\lambda_{ex}$ =488 nm). Nuclei were stained with Hoechst 33342 (blue).

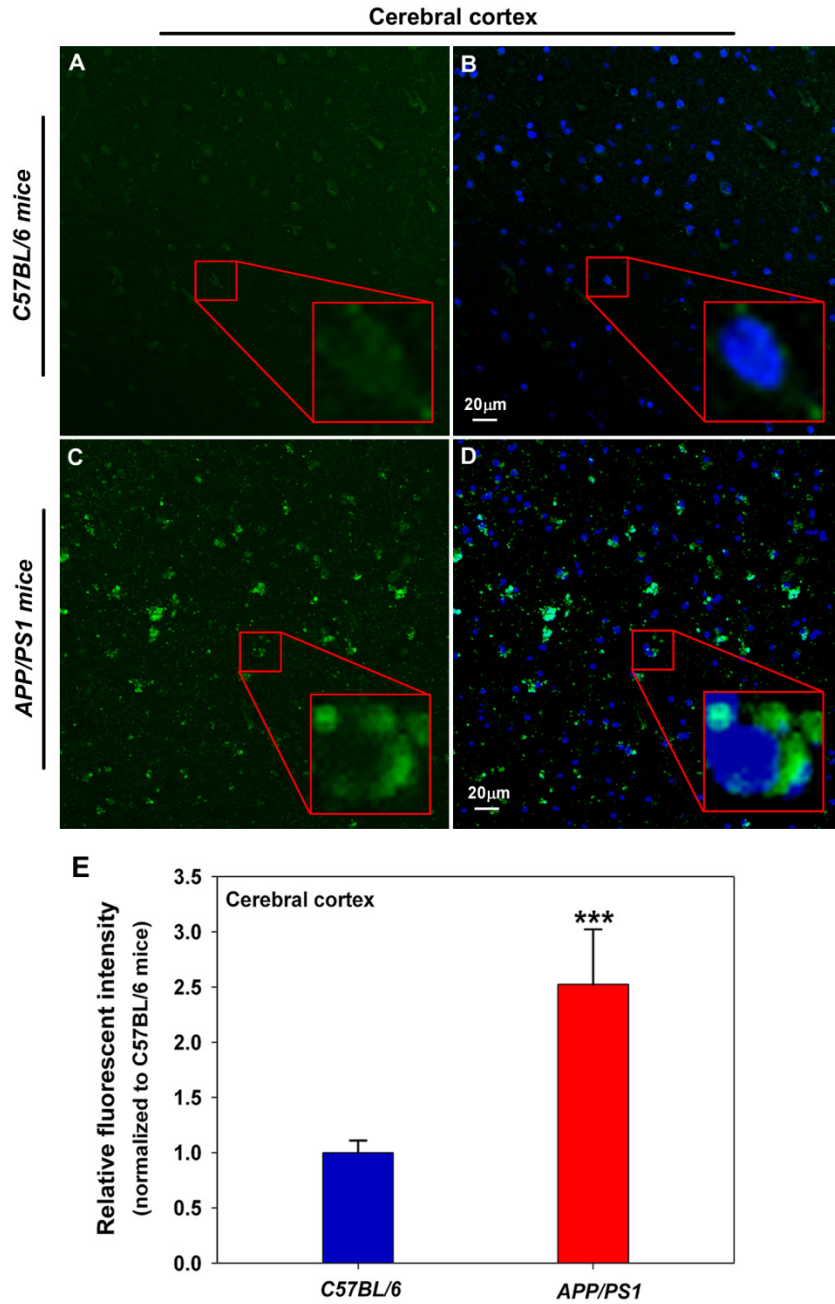

**Figure S26.** Application of **PFM** for monitoring endogenous FA in living brain tissues of *APP/PS1* transgenic mice. Fluorescence images of cerebral cortex of C57BL/6 (A, B) and *APP/PS1* transgenic mice (C, D) were detected following **PFM** (20  $\mu$ M) incubation for 30 min. The **PFM** fluorescence was monitored at 515-545 nm (green,  $\lambda_{ex}$ =488 nm). Nuclei were stained with Hoechst 33342 (blue). Scale bar=20  $\mu$ m. (E) Quantification of image data. Data are expressed as mean $\pm$ S.E.M., \*\*\* $P$ <0.001 versus C57BL/6 mice.

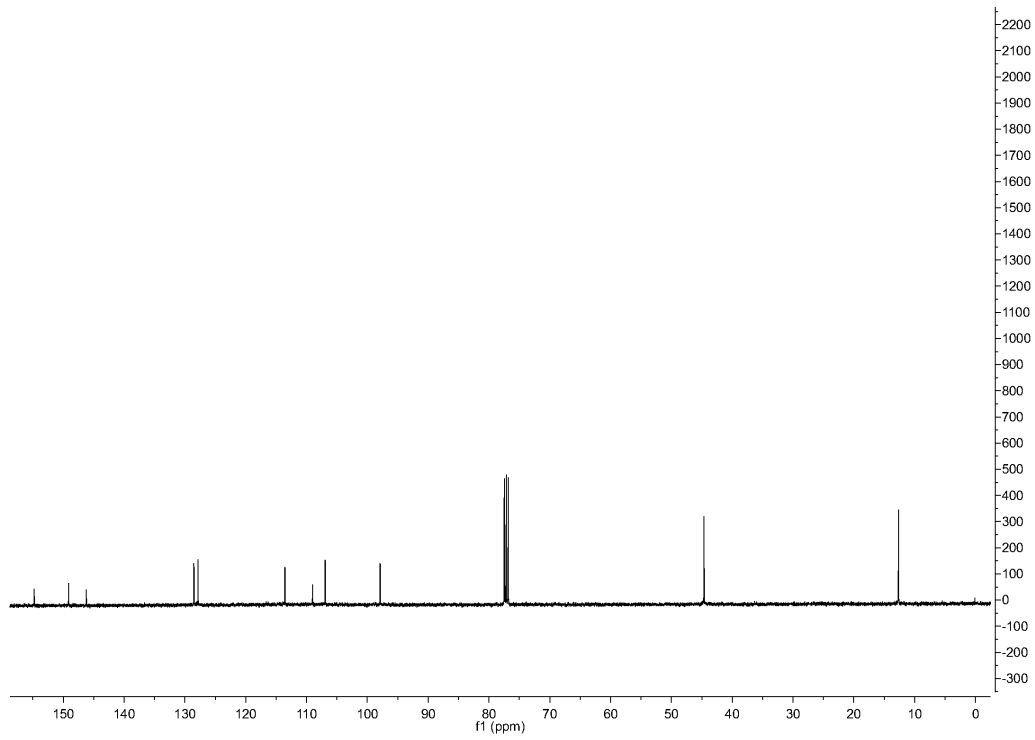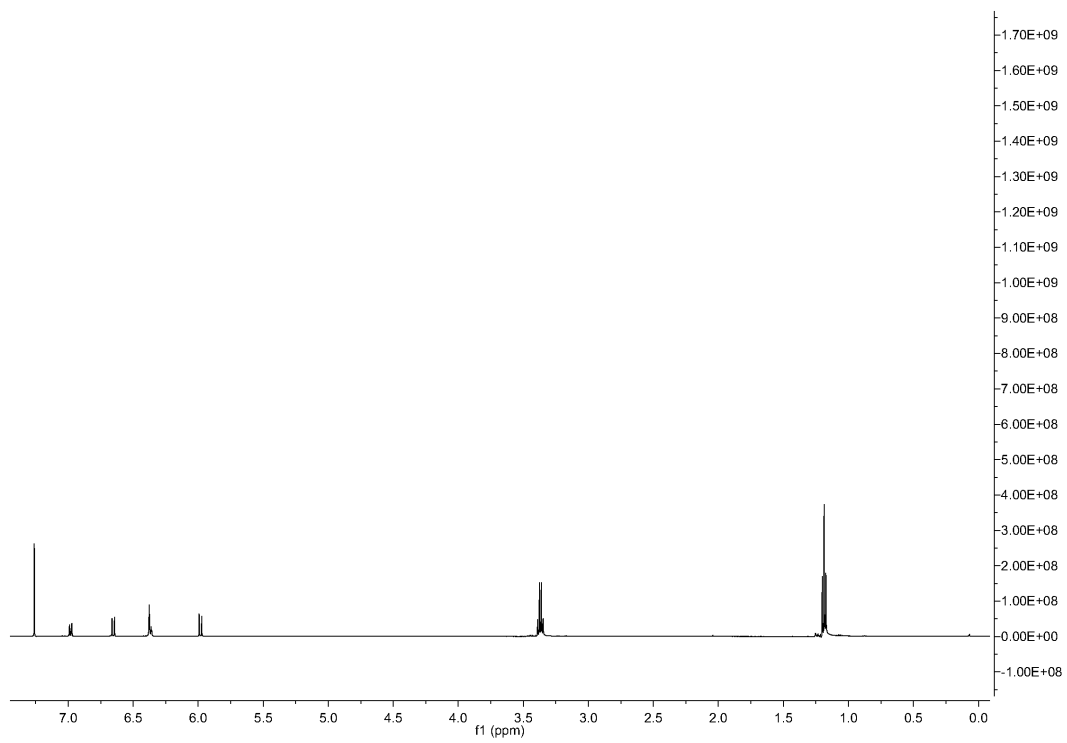

NMR traces of PFM
